# Supplementary material
Source: ML conference proceedings conference paper supplement (https://openaccess.thecvf.com/content/CVPR2023/html/Karpikova_FIANCEE_Faster_Inference_CVPR_2023_paper.html)
Supplement: Supplementary file 1 [file Karpikova_FIANCEE_Faster_Inference_CVPR_2023_supplemental.zip]

Archive with 5 entries (5 files):
- fiancee_supmat/1st_0103_lpips_threshold.mp4
- fiancee_supmat/1st_015_lpips_threshold.mp4
- fiancee_supmat/2nd_008_lpips_threshold.mp4
- fiancee_supmat/2nd_0119_lpips_threshold.mp4
- fiancee_supmat/fiancee_supmat.pdf
